# Supplementary material for: Psilocybin, an Effective Treatment for Major Depressive Disorder in Adults - A Systematic Review
Source: PubMed Central journal article supplement — Clin Psychopharmacol Neurosci. 2023 Oct 16;22(1):2–12. doi: 10.9758/cpn.23.1120 (PMC10811389; doi:10.9758/cpn.23.1120), 2023-10-16
Supplement: cpn-22-1-2-supple.pdf [file cpn-22-1-2-supple.pdf]

## SUPPLEMENTARY MATERIAL

### Data-base searches

PubMed used the two concepts

- “Depressive Disorder, Treatment-Resistant”[Mesh] OR “Depressive disorder”(Mesh) OR “Depressive Disorder, Major”[Mesh]
- “Psilocybin” (Mesh)

The search therefore was: (“Psilocybin”[Mesh]) AND (((“Depressive Disorder, Treatment-Resistant”[Mesh]) OR “Depressive Disorder”[Mesh]) OR “Depressive Disorder, Major”[Mesh])

Web of Science used:

- (Psilocybin)
- (“treatment-resistant depression” OR “depressive disorder”)

The search therefore was: (ALL=((Psilocybin))) AND ALL=(“treatment-resistant depression” OR “depressive disorder”)
